# Supplementary material
Source: PubMed Central journal article supplement (PMC9939009)
Supplement: NIHMS1868248-supplement-Appendix.pdf [file NIHMS1868248-supplement-Appendix.pdf]

## APPENDIX

### A.1. Variable construction

We relied on the May 1, 2021 calendar year version of the RAND Hospital Data file. The managers of the RAND Hospital Data file generate these data by cleaning and processing annual cost report data submitted by hospitals to the Healthcare Provider Cost Reporting Information System (HCRIS). Among other steps, they standardize cost reporting periods by apportioning data into calendar years and federal fiscal years.<sup>1</sup> The RAND Hospital Data are available for a fee, though a limited version is available for free in the most recent year. Raw HCRIS data are online for free, as are Stata code that apply basic cleaning procedures.<sup>2</sup> Appendix Exhibit 1 displays the HCRIS variables and calculations used to derive the RAND Hospital Data estimates of commercial-to-Medicare price ratios.

### Appendix Exhibit 1. HCRIS variables and calculations used to derive the RAND Hospital Data estimate of commercial-to-Medicare price ratios

| Variable                      | Label                                                                                                                                                                                                                                  | Source (formula or 2552-10 worksheet, column, and line number)                                                                                                                                                                                                                                     |
|-------------------------------|----------------------------------------------------------------------------------------------------------------------------------------------------------------------------------------------------------------------------------------|----------------------------------------------------------------------------------------------------------------------------------------------------------------------------------------------------------------------------------------------------------------------------------------------------|
| commercial_to_mdcr_est        | Ratio of estimated commercial revenue-to-charge ratio to Medicare revenue-to-charge ratio (2552-10 only)<br>[commercial_to_mdcr_est]                                                                                                   | =commercial_rev_to_charges_est/mdcr_rev_to_charges;                                                                                                                                                                                                                                                |
| commercial_rev_to_charges_est | Estimated commercial revenue-to-charge ratio (2552-10 only)<br>[commercial_rev_to_charges_est]                                                                                                                                         | =commercial_rev_est/commercial_charges_est;                                                                                                                                                                                                                                                        |
| mdcr_rev_to_charges           | Medicare revenue-to-charge ratio<br>[mdcr_rev_to_charges]                                                                                                                                                                              | =sum(mdcr_inpat_revs,mdcr_outpat_revs)/sum(mdcr_inpat_charges,mdcr_outpat_charges);                                                                                                                                                                                                                |
| commercial_charges_est        | Estimated charges from commercial payers, i.e. net patient revenues minus revenues from Medicare (fee-for-service plus estimated Medicare Advantage), Medicaid, SCHIP, state/local indigent (2552-10 only)<br>[commercial_charges_est] | =(source_2552_10>0)*max(0,sum(inpat_charges_total,outpat_charges_total)-sum(mdcd_charges,schip_charges,stloc_indigent_charges,chgs_charity_patients_only10,mdcr_outpat_charges,mdcr_inpat_charges,mdcr_adv_charges_est));                                                                          |
| commercial_rev_est            | Estimated revenues from commercial payers, i.e. net patient revenues minus revenues from Medicare (fee-for-service plus estimated Medicare Advantage), Medicaid, SCHIP, state/local indigent (2552-10 only)<br>[commercial_rev_est]    | =(source_2552_10>0)*max(0,net_patient_rev-sum(mdcd_net_revenue_only10,mdcd_DSH_revenue_only10,schip_net_revenue_only10,stloc_indigent_net_rev_only10,priv_grants_for_charity_only10,govt_grants_for_uncomp_only10,pymt_insured_charity_only10,mdcr_inpat_revs,mdcr_outpat_revs,mdcr_adv_rev_est)); |
| source_2552_10                | Cost report data is from form 2552-10 (0/1)<br>[source_2552_10]                                                                                                                                                                        |                                                                                                                                                                                                                                                                                                    |
| inpat_charges_total           | Inpatient charges, Total (2552-10 only)<br>[inpat_charges_total]                                                                                                                                                                       | n10_C000001_00600_20200                                                                                                                                                                                                                                                                            |
| outpat_charges_total          | Outpatient charges, Total (2552-10 only)<br>[outpat_charges_total]                                                                                                                                                                     | n10_C000001_00700_20200                                                                                                                                                                                                                                                                            |
| mdcd_charges                  | Medicaid charges [mdcd_charges]                                                                                                                                                                                                        | n10_S100000_00100_00600                                                                                                                                                                                                                                                                            |
| schip_charges                 | Stand-alone SCHIP charges [schip_charges]                                                                                                                                                                                              | n10_S100000_00100_01000                                                                                                                                                                                                                                                                            |
| stloc_indigent_charges        | Charges for patients covered under state or local indigent care program<br>[stloc_indigent_charges]                                                                                                                                    | n10_S100000_00100_01400                                                                                                                                                                                                                                                                            |

| Variable                       | Label                                                                                                                                        | Source (formula or 2552-10 worksheet, column, and line number)                                                                                                                         |
|--------------------------------|----------------------------------------------------------------------------------------------------------------------------------------------|----------------------------------------------------------------------------------------------------------------------------------------------------------------------------------------|
| chgs_charity_patients_only10   | Total initial obligation (charges) of patients approved for charity care (2552-10 only) [chgs_charity_patients_only10]                       | n10_S100000_00300_02000                                                                                                                                                                |
| mdcr_outpat_charges            | Medicare outpatient charges [mdcr_outpat_charges]                                                                                            | n10_D00A185_00200_20200                                                                                                                                                                |
| mdcr_inpat_charges             | Medicare inpatient charges [mdcr_inpat_charges]                                                                                              | =sum(mdcr_inpat_charges_adpeds,mdcr_inpat_charges_ICU,mdcr_inpat_charges_CCU,mdcr_inpat_charges_BICU,mdcr_inpat_charges_SICU,mdcr_inpat_charges_OSCU,mdcr_inpat_charges_anc_outp_oth); |
| mdcr_adv_charges_est           | Estimate of billed charges for services (inpatient plus outpatient) provided to enrollees in Medicare Advantage plans [mdcr_adv_charges_est] | =sum(mdcr_inpat_charges,mdcr_outpat_charges)*(mdcr_hmo_inpat_days/mdcr_inpat_days);                                                                                                    |
| net_patient_rev                | Net patient revenue (charges minus contractual allowances and discounts) [net_patient_rev]                                                   | n10_G300000_00100_00300                                                                                                                                                                |
| mdcd_net_revenue_only10        | Net revenue from Medicaid (2552-10 only) [mdcd_net_revenue_only10]                                                                           | n10_S100000_00100_00200                                                                                                                                                                |
| mdcd_DSH_revenue_only10        | DSH or supplemental payments from Medicaid (2552-10 only) [mdcd_DSH_revenue_only10]                                                          | n10_S100000_00100_00500                                                                                                                                                                |
| schip_net_revenue_only10       | Net revenue from stand-alone SCHIP (2552-10 only) [schip_net_revenue_only10]                                                                 | n10_S100000_00100_00900                                                                                                                                                                |
| stloc_indigent_net_rev_only10  | Net revenue from state or local indigent care program (2552-10 only) [stloc_indigent_net_rev_only10]                                         | n10_S100000_00100_01300                                                                                                                                                                |
| priv_grants_for_charity_only10 | Private grants, donations, or endowment income restricted to funding charity care (2552-10 only) [priv_grants_for_charity_only10]            | n10_S100000_00100_01700                                                                                                                                                                |
| govt_grants_for_uncomp_only10  | Government grants, appropriations or transfers for support of hospital operations (2552-10 only) [govt_grants_for_uncomp_only10]             | n10_S100000_00100_01800                                                                                                                                                                |
| pymt_insured_charity_only10    | Partial payment by insured patients approved for charity care (2552-10 only) [pymt_insured_charity_only10]                                   | n10_S100000_00200_02200                                                                                                                                                                |
| mdcr_inpat_revs                | Medicare inpatient revenues [mdcr_inpat_revs]                                                                                                | =sum(mdcr_inpat_revs_pps_woimeadj,mdcr_inpat_revs_costreimb);                                                                                                                          |
| mdcr_outpat_revs               | Medicare outpatient revenues [mdcr_outpat_revs]                                                                                              | =sum(mdcr_outpat_lesser_costchg,mdcr_outpat_pps_pymts);                                                                                                                                |
| mdcr_adv_rev_est               | Estimate of revenues for services (inpatient plus outpatient) provided to enrollees in Medicare Advantage plans [mdcr_adv_rev_est]           | =mdcr_adv_charges_est*mdcr_rev_to_charges;                                                                                                                                             |
| mdcr_inpat_charges_adpeds      | Medicare inpatient program charges, adults and pediatrics (general routine care) [mdcr_inpat_charges_adpeds]                                 | n10_D30A180_00200_03000                                                                                                                                                                |
| mdcr_inpat_charges_ICU         | Medicare inpatient program charges, Intensive care unit [mdcr_inpat_charges_ICU]                                                             | n10_D30A180_00200_03100                                                                                                                                                                |

| Variable                        | Label                                                                                                                                                                      | Source (formula or 2552-10 worksheet, column, and line number)                                                                               |
|---------------------------------|----------------------------------------------------------------------------------------------------------------------------------------------------------------------------|----------------------------------------------------------------------------------------------------------------------------------------------|
| mdcr_inpat_charges_CCU          | Medicare inpatient program charges, Coronary care unit [mdcr_inpat_charges_CCU]                                                                                            | n10_D30A180_00200_03200                                                                                                                      |
| mdcr_inpat_charges_BICU         | Medicare inpatient program charges, Burn intensive care unit [mdcr_inpat_charges_BICU]                                                                                     | n10_D30A180_00200_03300                                                                                                                      |
| mdcr_inpat_charges_SICU         | Medicare inpatient program charges, Surgical intensive care unit [mdcr_inpat_charges_SICU]                                                                                 | n10_D30A180_00200_03400                                                                                                                      |
| mdcr_inpat_charges_OSCU         | Medicare inpatient program charges, Other special care unit [mdcr_inpat_charges_OSCU]                                                                                      | n10_D30A180_00200_03500                                                                                                                      |
| mdcr_inpat_charges_anc_outp_oth | Medicare inpatient program charges, ancillary service cost centers, outpatient service cost centers, and other reimbursable cost centers [mdcr_inpat_charges_anc_outp_oth] | n10_D30A180_00200_20200                                                                                                                      |
| mdcr_hmo_inpat_days             | Inpatient days, Medicare HMO (i.e. Medicare Advantage) [mdcr_hmo_inpat_days]                                                                                               | n10_S300001_00600_00200                                                                                                                      |
| mdcr_inpat_days                 | Inpatient days, Medicare [mdcr_inpat_days]                                                                                                                                 | n10_S300001_00600_01400                                                                                                                      |
| mdcr_inpat_revs_pps_woimeadj    | Medicare inpatient revenues from prospective payment system (without managed care IME payment adjustment) [mdcr_inpat_revs_pps_woimeadj]                                   | =sum(mdcr_inpat_pps_pymts,-mdcr_dgme_pymt,(FY_BGN_DT_1>=input('19971001',yymmdd8.))*sum(-mdcr_reimb_bad_debt,mdcr_adjstmnt_reimb_bad_debt)); |
| mdcr_inpat_revs_costreimb       | Medicare inpatient revenues from cost reimbursement (for critical access hospitals [CAHs]) [mdcr_inpat_revs_costreimb]                                                     | =sum(mdcr_inpat_costreim_primpayer,mdcr_inpat_costreim_costsrvcs);                                                                           |
| mdcr_outpat_lesser_costchg      | Medicare outpatient, lesser of costs or charges [mdcr_outpat_lesser_costchg]                                                                                               | n10_E00A18B_00100_02100                                                                                                                      |
| mdcr_outpat_pps_pymts           | Medicare outpatient payments under prospective payment [mdcr_outpat_pps_pymts]                                                                                             | n10_E00A18B_00100_02400                                                                                                                      |
| mdcr_inpat_pps_pymts            | Medicare inpatient payments under prospective payment system [mdcr_inpat_pps_pymts]                                                                                        | n10_E00A18A_00100_05900                                                                                                                      |
| mdcr_dgme_pymt                  | Medicare direct graduate medical education payment, Clinic [mdcr_dgme_pymt]                                                                                                | n10_E00A18A_00100_05200                                                                                                                      |
| mdcr_reimb_bad_debt             | Medicare allowable bad debts, Observation Beds (see instructions) [mdcr_reimb_bad_debt]                                                                                    | n10_E00A18A_00100_06400                                                                                                                      |
| mdcr_adjstmnt_reimb_bad_debt    | Medicare adjusted reimbursable bad debts, Other Outpatient Service (specify) [mdcr_adjstmnt_reimb_bad_debt]                                                                | n10_E00A18A_00100_06500                                                                                                                      |
| mdcr_inpat_costreim_primpayer   | Medicare inpatient under cost reimbursement, primary payer payments [mdcr_inpat_costreim_primpayer]                                                                        | n10_E30A185_00100_00500                                                                                                                      |
| mdcr_inpat_costreim_costsrvcs   | Medicare inpatient under cost reimbursement, costs of covered services [mdcr_inpat_costreim_costsrvcs]                                                                     | n10_E30A185_00100_01900                                                                                                                      |
| FY_BGN_DT_1                     | Beginning date of hospital fiscal year (first cost report used) [FY_BGN_DT_1]                                                                                              |                                                                                                                                              |

SOURCE: May 2021 RAND Hospital Data public use file documentation.

**A.2. Comparison to other price estimates.** We compared our estimates of commercial-to-Medicare price ratios at the hospital and HRR level to results from the RAND Price Transparency Project, which includes estimates of price ratios from more granular data but for fewer hospitals and years.<sup>3</sup> To generate estimates of commercial-to-Medicare price ratios, the authors of the RAND Price Transparency Project: (1) collected commercial claims data from about 120 self-insurance employers and from all-payer claims databases (APCDs) in six states, (2) took the sum of commercial payer allowed amounts for each hospital, (3) simulated Medicare payments based on administrative formulas for the same set of services at each hospital, and (4) took the ratio of commercial allowed amounts and simulated Medicare payments for each hospital.<sup>3</sup> When comparing the RAND Price Transparency Project results to our estimates, we focused on the six states that contributed APCD data: Connecticut, Colorado, Delaware, Maine, New Hampshire, and Rhode Island. The RAND Price Transparency Project covers a relatively large set of commercial payers in these states and may therefore be more comparable to price ratio estimates from RAND Hospital Data, which include all commercial payers except for Medicare Advantage and Medicaid managed care plans. We compared price ratio estimates from 2018, the most recent and comprehensive data available under the RAND Price Transparency Project.

Price ratio estimates from the RAND Price Transparency Project are typically larger than estimates from our study, though there is a strong correlation between the two (Appendix Exhibits 2 and 3). We estimated a linear regression model relating price ratios from the RAND Price Transparency Project against estimates from our study, weighting by commercial discharge-equivalents. Hospital-level regressions yielded an  $R^2$  of 0.52 and HRR-level regressions yielded an  $R^2$  of 0.71 (Appendix Exhibits 2 and 3).

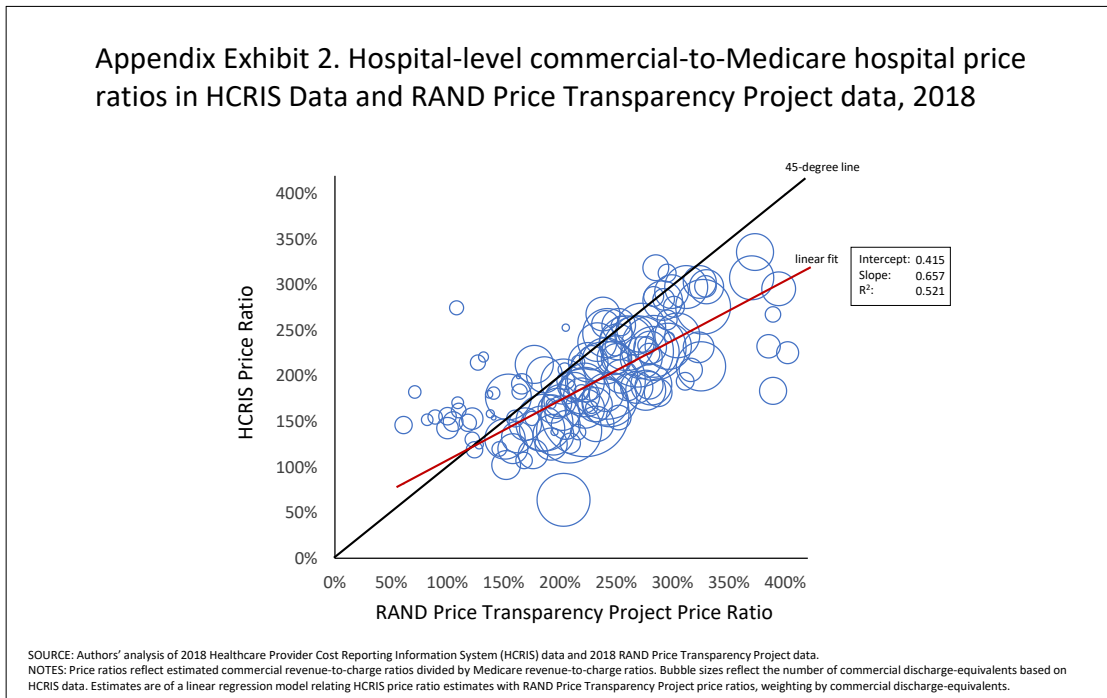

Appendix Exhibit 3. HRR-level commercial-to-Medicare hospital price ratios in HCRIS Data and RAND Price Transparency Project data, 2018

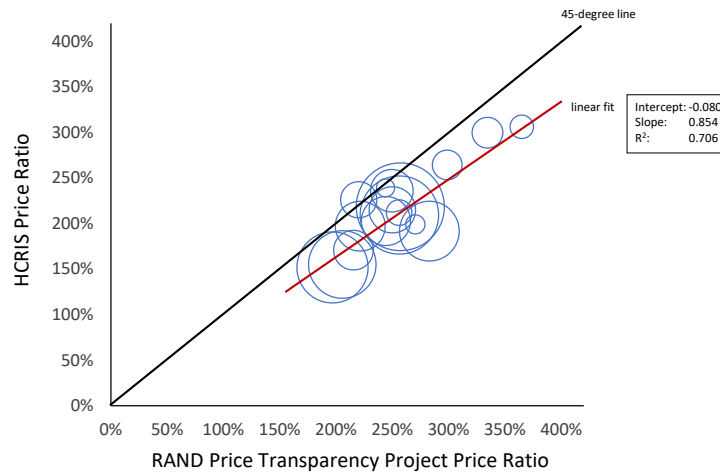

SOURCE: Authors' analysis of 2018 Healthcare Provider Cost Reporting Information System (HCRIS) data and 2018 RAND Price Transparency Project data.  
 NOTES: Price ratios reflect estimated commercial revenue-to-charge ratios divided by Medicare revenue-to-charge ratios. Bubble sizes reflect the number of commercial discharge-equivalents based on HCRIS data. Estimates are of a linear regression model relating HCRIS price ratio estimates with RAND Price Transparency Project price ratios, weighting by commercial discharge-equivalents.

**A.3. Hospital-level results.** Our primary analyses focused on HRR-level trends in commercial-to-Medicare price ratios. In this section, we evaluate price ratio trends at the hospital level. These results should be interpreted with caution. For example, hospital-level data may be less precise than HRR-level data to the extent that some hospitals have large reporting errors that are muted when averaged with other hospitals in the same region. We focused on interquartile ranges (weighted by 2012 commercial DEs) as a measure of hospital-level variation in order to draw attention away from potential outliers.

With this caveat in mind, we find that price ratio trends varied substantially across hospitals, reflecting variations in trends both across and within HRRs. The 25<sup>th</sup> percentile of hospital-level price ratio trends was a 16 percentage point decrease and the 75<sup>th</sup> percentile was a 28 percentage point increase, yielding a 44 percentage point interquartile range. The interquartile range at the HRR-level was 27 percentage points and the average within-HRR hospital-level interquartile range (weighting by 2012 commercial DEs) was 41 percentage points.

**A.4. Additional results.** The following exhibits show additional results described in the main text. Appendix Exhibit 4 shows the variation in the change in price ratios from 2012 to 2019, by quartile of 2012 price ratios. Appendix Exhibits 5 and 6 show the results of supplementary analyses that hold hospital volume constant and hold hospital price ratios constant, respectively. Appendix Exhibits 7, 8, and 9 map price ratio levels and trends for every HRR in the country (Appendix Exhibit 9 is identical to Exhibit 4 in the main text). Appendix Exhibit 10 shows the commercial-to-Medicare price ratios for each HRR by year, and the quartiles of 2012 prices and quartiles of the price change from 2012 to 2019.

### Appendix Exhibit 4. Percentage point change in commercial-to-Medicare price ratios, by initial price ratio quartile, 2012-2019

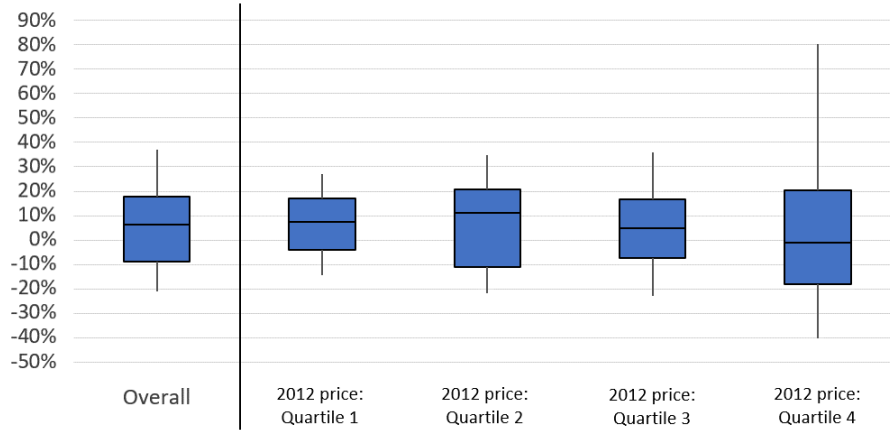

SOURCE: Authors' analysis of 2012 and 2019 Healthcare Provider Cost Reporting Information System (HCRIS) data.  
 NOTES: Price ratio estimates reflect estimated commercial revenue-to-charge ratios divided by Medicare revenue-to-charge ratios. Each box plot displays the median and interquartile range. Whiskers display the 10<sup>th</sup> and 90<sup>th</sup> percentiles. Price ratios are weighted by the number of commercial discharge-equivalents.

### Appendix Exhibit 5. Trends in commercial-to-Medicare price ratios holding hospital volume constant but allowing hospital price ratios to vary

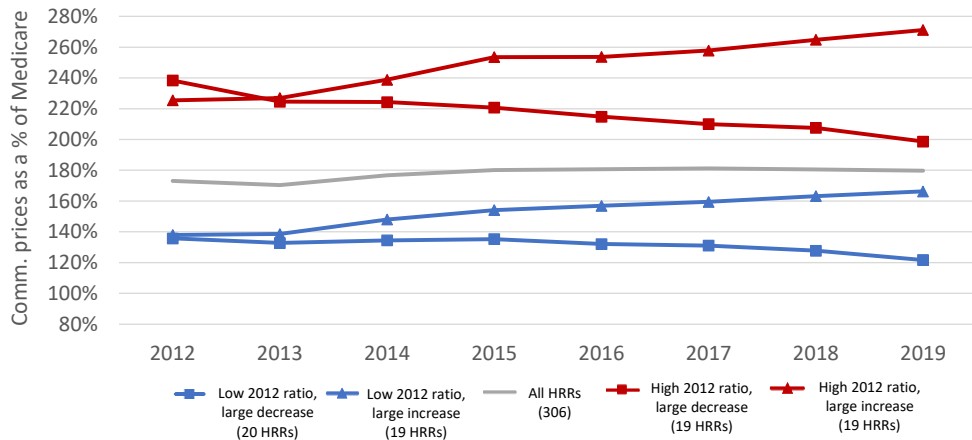

SOURCE: Authors' analysis of 2012-2019 Healthcare Provider Cost Reporting Information System (HCRIS) data.  
 NOTES: Price ratio estimates reflect estimated commercial revenue-to-charge ratios divided by Medicare revenue-to-charge ratios. High 2012 ratios and low 2012 ratios refer to HRRs with the highest 25% (top quartile) and lowest 25% (bottom quartile) of commercial-to-Medicare price ratios in the initial year of the study period. Large increase and large decrease refer to HRRs that, within their initial price ratio group, are in the top and bottom price ratio change quartiles as measured over the 2012-2019 study period. Price ratios are weighted by the number of commercial discharge equivalents. HRR is hospital referral region.

### Appendix Exhibit 6. Trends in commercial-to-Medicare price ratios holding hospital price ratios constant but allowing hospital volume to vary

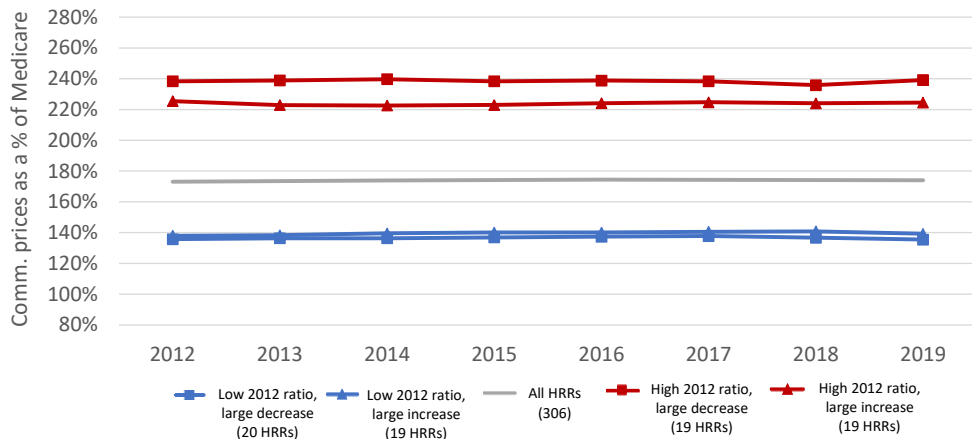

SOURCE: Authors' analysis of 2012-2019 Healthcare Provider Cost Reporting Information System (HCRIS) data.  
 NOTES: Price ratio estimates reflect estimated commercial revenue-to-charge ratios divided by Medicare revenue-to-charge ratios. High 2012 ratios and low 2012 ratios refer to HRRs with the highest 25% (top quartile) and lowest 25% (bottom quartile) of commercial-to-Medicare price ratios in the initial year of the study period. Large increase and large decrease refer to HRRs that, within their initial price ratio group, are in the top and bottom price ratio change quartiles as measured over the 2012-2019 study period. Price ratios are weighted by the number of commercial discharge equivalents. HRR is hospital referral region.

### Appendix Exhibit 7. Commercial-to-Medicare hospital price ratios in 2012, by Hospital Referral Region (HRR)

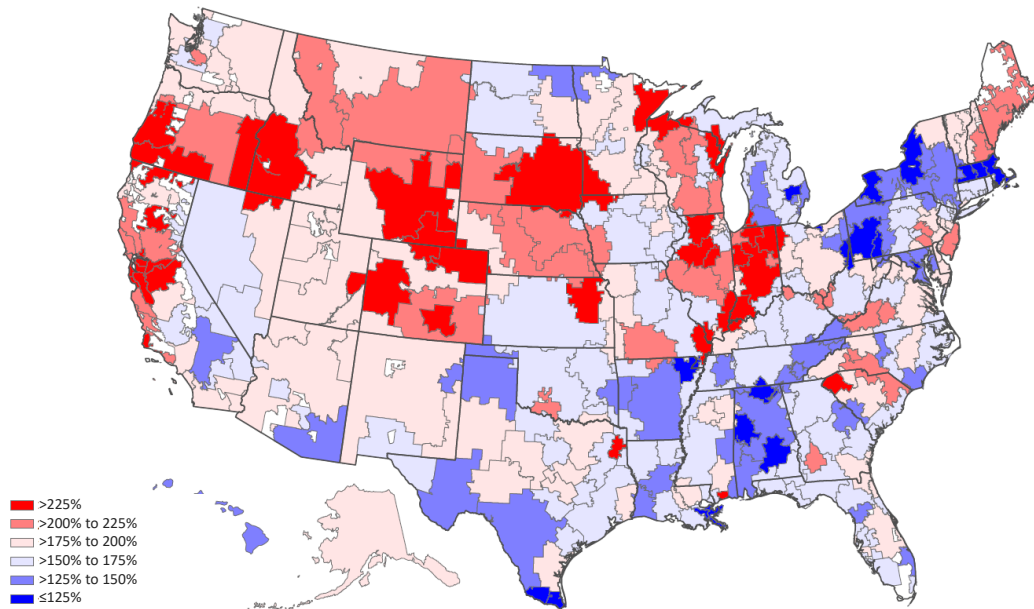

SOURCE: Authors' analysis of 2012-19 Healthcare Cost Report Information System (HCRIS) data.  
 NOTES: Price ratio estimates reflect estimated commercial revenue-to-charge ratios divided by Medicare revenue-to-charge ratios. Areas with no color are not part of an HRR.

Appendix Exhibit 8. Commercial-to-Medicare hospital price ratios in 2019, by Hospital Referral Region (HRR)

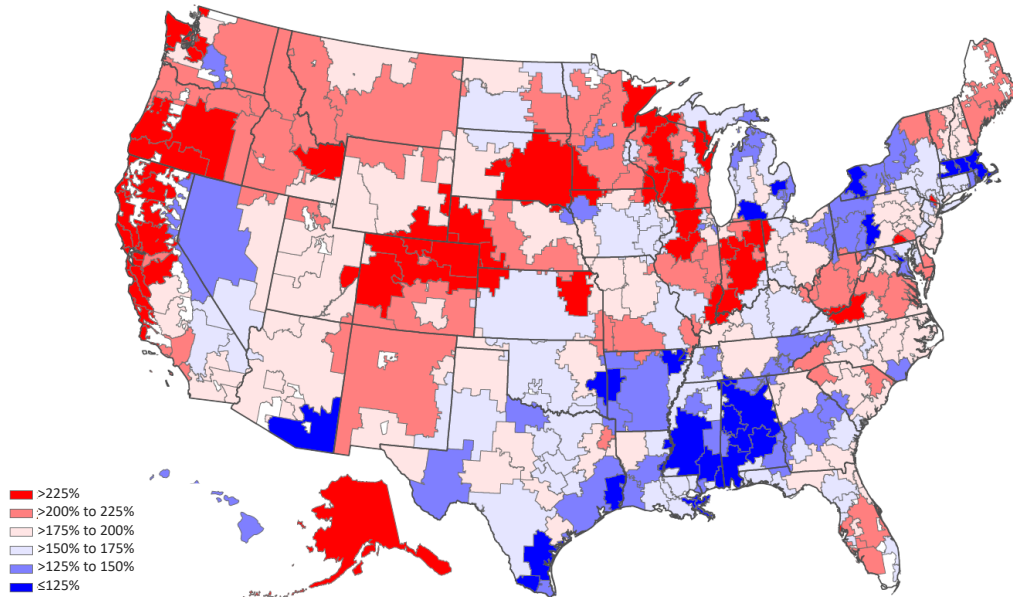

SOURCE: Authors' analysis of 2012–19 Healthcare Cost Report Information System (HCRIS) data.  
 NOTES: Price ratio estimates reflect estimated commercial revenue-to-charge ratios divided by Medicare revenue-to-charge ratios. Areas with no color are not part of an HRR.

Appendix Exhibit 9. Percentage point change in commercial-to-Medicare hospital price ratios from 2012 to 2019, by Hospital Referral Region (HRR)

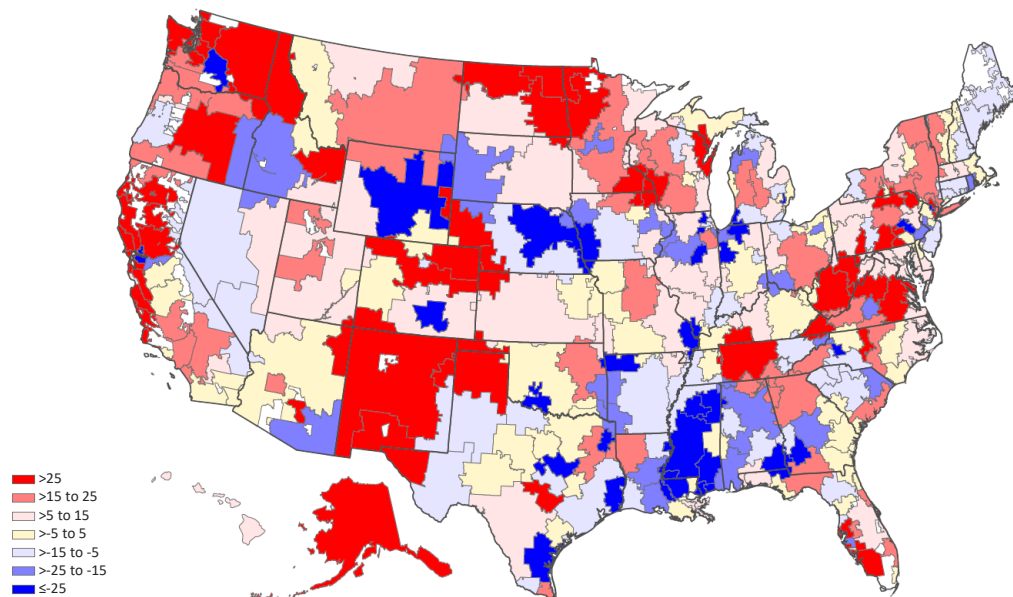

SOURCE: Authors' analysis of 2012–19 Healthcare Cost Report Information System (HCRIS) data.  
 NOTES: Price ratio estimates reflect estimated commercial revenue-to-charge ratios divided by Medicare revenue-to-charge ratios. Areas with no color are not part of an HRR.



### Appendix Exhibit 10. Trends in commercial-to-Medicare price ratios, by HRR

| HRR City             | 2012<br>qrtil | 2012<br>(%) | 2013<br>(%) | 2014<br>(%) | 2015<br>(%) | 2016<br>(%) | 2017<br>(%) | 2018<br>(%) | 2019<br>(%) | Perc pt.<br>change | Change<br>qrtil |
|----------------------|---------------|-------------|-------------|-------------|-------------|-------------|-------------|-------------|-------------|--------------------|-----------------|
| Tacoma, WA           | 4             | 222         | 202         | 209         | 215         | 198         | 268         | 300         | 337         | 115                | 4               |
| Chico, CA            | 4             | 237         | 233         | 283         | 343         | 295         | 307         | 332         | 338         | 101                | 4               |
| San Mateo County, CA | 4             | 246         | 247         | 267         | 295         | 281         | 297         | 331         | 329         | 83                 | 4               |
| Santa Barbara, CA    | 4             | 282         | 291         | 294         | 309         | 304         | 315         | 349         | 362         | 80                 | 4               |
| Salinas, CA          | 4             | 221         | 261         | 277         | 294         | 283         | 281         | 283         | 290         | 69                 | 4               |
| Bend, OR             | 4             | 222         | 172         | 253         | 246         | 228         | 236         | 297         | 288         | 66                 | 4               |
| Napa, CA             | 4             | 222         | 218         | 239         | 251         | 225         | 251         | 251         | 276         | 54                 | 4               |
| Alameda County, CA   | 4             | 251         | 246         | 255         | 289         | 322         | 295         | 293         | 294         | 43                 | 4               |
| Sacramento, CA       | 4             | 215         | 211         | 205         | 229         | 240         | 244         | 250         | 257         | 42                 | 4               |
| San Francisco, CA    | 4             | 209         | 218         | 232         | 241         | 244         | 253         | 255         | 248         | 39                 | 4               |
| San Jose, CA         | 4             | 227         | 233         | 269         | 270         | 267         | 261         | 263         | 264         | 38                 | 4               |
| Green Bay, WI        | 4             | 239         | 247         | 260         | 266         | 271         | 264         | 272         | 277         | 37                 | 4               |
| Santa Rosa, CA       | 4             | 224         | 222         | 233         | 247         | 255         | 262         | 261         | 260         | 36                 | 4               |
| San Luis Obispo, CA  | 4             | 200         | 214         | 244         | 250         | 229         | 224         | 223         | 234         | 34                 | 4               |
| Greeley, CO          | 4             | 266         | 261         | 288         | 306         | 303         | 293         | 296         | 294         | 28                 | 4               |
| Billings, MT         | 4             | 203         | 206         | 201         | 206         | 214         | 223         | 225         | 224         | 21                 | 4               |
| Marshfield, WI       | 4             | 215         | 216         | 238         | 262         | 263         | 233         | 206         | 236         | 21                 | 4               |
| Roanoke, VA          | 4             | 210         | 196         | 207         | 233         | 254         | 230         | 227         | 230         | 20                 | 4               |
| Madison, WI          | 4             | 211         | 228         | 234         | 239         | 232         | 237         | 228         | 230         | 19                 | 4               |
| Medford, OR          | 4             | 249         | 252         | 263         | 277         | 268         | 265         | 253         | 265         | 16                 | 3               |
| Rockford, IL         | 4             | 246         | 242         | 249         | 247         | 257         | 258         | 262         | 260         | 15                 | 3               |
| Springfield, IL      | 4             | 202         | 206         | 215         | 220         | 219         | 213         | 214         | 217         | 14                 | 3               |
| Fort Wayne, IN       | 4             | 242         | 243         | 247         | 241         | 244         | 250         | 250         | 254         | 12                 | 3               |
| Duluth, MN           | 4             | 262         | 270         | 233         | 229         | 266         | 270         | 272         | 274         | 11                 | 3               |
| Salem, OR            | 4             | 209         | 208         | 224         | 243         | 245         | 228         | 226         | 220         | 11                 | 3               |
| Sioux Falls, SD      | 4             | 226         | 216         | 225         | 237         | 237         | 237         | 238         | 237         | 11                 | 3               |
| Colorado Springs, CO | 4             | 206         | 199         | 214         | 234         | 243         | 242         | 236         | 216         | 10                 | 3               |
| Milwaukee, WI        | 4             | 206         | 210         | 219         | 218         | 222         | 216         | 219         | 214         | 7                  | 3               |
| Urbana, IL           | 4             | 211         | 219         | 203         | 199         | 202         | 203         | 215         | 218         | 7                  | 3               |
| Santa Cruz, CA       | 4             | 240         | 251         | 285         | 299         | 256         | 253         | 257         | 246         | 6                  | 3               |
| Modesto, CA          | 4             | 282         | 238         | 273         | 287         | 300         | 295         | 287         | 286         | 4                  | 3               |
| Topeka, KS           | 4             | 239         | 223         | 227         | 237         | 239         | 233         | 234         | 241         | 2                  | 3               |
| Fort Collins, CO     | 4             | 238         | 238         | 235         | 234         | 245         | 252         | 251         | 239         | 1                  | 3               |
| Lancaster, PA        | 4             | 215         | 224         | 244         | 248         | 241         | 229         | 218         | 216         | 1                  | 3               |
| Ventura, CA          | 4             | 207         | 191         | 203         | 215         | 213         | 206         | 233         | 208         | 1                  | 3               |
| Indianapolis, IN     | 4             | 246         | 232         | 250         | 239         | 242         | 246         | 248         | 246         | 0                  | 3               |
| Grand Junction, CO   | 4             | 263         | 287         | 265         | 301         | 292         | 286         | 271         | 262         | -1                 | 3               |

| HRR City                   | 2012<br>qrtille | 2012<br>(%) | 2013<br>(%) | 2014<br>(%) | 2015<br>(%) | 2016<br>(%) | 2017<br>(%) | 2018<br>(%) | 2019<br>(%) | Perc pt.<br>change | Change<br>qrtille |
|----------------------------|-----------------|-------------|-------------|-------------|-------------|-------------|-------------|-------------|-------------|--------------------|-------------------|
| Huntington, WV             | 4               | 204         | 193         | 202         | 205         | 208         | 199         | 196         | 202         | -2                 | 3                 |
| Missoula, MT               | 4               | 205         | 208         | 227         | 215         | 210         | 219         | 217         | 201         | -4                 | 2                 |
| Springfield, MO            | 4               | 210         | 196         | 206         | 216         | 213         | 211         | 211         | 205         | -5                 | 2                 |
| Muncie, IN                 | 4               | 209         | 243         | 283         | 240         | 228         | 222         | 209         | 203         | -6                 | 2                 |
| Wausau, WI                 | 4               | 210         | 225         | 243         | 254         | 252         | 246         | 211         | 203         | -8                 | 2                 |
| Eugene, OR                 | 4               | 240         | 228         | 247         | 242         | 231         | 218         | 227         | 232         | -9                 | 2                 |
| Lincoln, NE                | 4               | 218         | 234         | 236         | 212         | 221         | 223         | 209         | 209         | -9                 | 2                 |
| Charlotte, NC              | 4               | 203         | 188         | 199         | 221         | 213         | 203         | 198         | 194         | -9                 | 2                 |
| Camden, NJ                 | 4               | 202         | 200         | 195         | 190         | 190         | 194         | 190         | 191         | -11                | 2                 |
| Greenville, SC             | 4               | 227         | 234         | 226         | 231         | 253         | 227         | 201         | 215         | -11                | 2                 |
| Portland, ME               | 4               | 215         | 198         | 208         | 213         | 215         | 221         | 210         | 203         | -12                | 2                 |
| Evansville, IN             | 4               | 252         | 244         | 247         | 235         | 237         | 228         | 233         | 240         | -12                | 2                 |
| Bangor, ME                 | 4               | 222         | 217         | 233         | 239         | 231         | 226         | 219         | 208         | -13                | 2                 |
| Manchester, NH             | 4               | 210         | 204         | 204         | 208         | 204         | 200         | 192         | 196         | -14                | 2                 |
| Boulder, CO                | 4               | 236         | 230         | 228         | 230         | 238         | 241         | 232         | 222         | -14                | 2                 |
| Florence, SC               | 4               | 220         | 216         | 213         | 211         | 207         | 212         | 202         | 205         | -15                | 2                 |
| Boise, ID                  | 4               | 241         | 247         | 239         | 231         | 226         | 225         | 229         | 223         | -18                | 2                 |
| Covington, KY              | 4               | 210         | 177         | 181         | 187         | 189         | 193         | 197         | 192         | -18                | 2                 |
| Peoria, IL                 | 4               | 253         | 252         | 259         | 258         | 247         | 174         | 204         | 234         | -19                | 2                 |
| Lynchburg, VA              | 4               | 204         | 199         | 192         | 201         | 207         | 203         | 188         | 185         | -20                | 2                 |
| Stockton, CA               | 4               | 234         | 236         | 227         | 245         | 222         | 214         | 206         | 215         | -20                | 1                 |
| Gary, IN                   | 4               | 218         | 204         | 214         | 186         | 193         | 182         | 189         | 195         | -23                | 1                 |
| Rapid City, SD             | 4               | 203         | 188         | 167         | 163         | 166         | 171         | 177         | 178         | -25                | 1                 |
| Omaha, NE                  | 4               | 206         | 201         | 201         | 195         | 191         | 177         | 176         | 181         | -25                | 1                 |
| Reading, PA                | 4               | 206         | 195         | 185         | 185         | 188         | 190         | 185         | 177         | -29                | 1                 |
| Munster, IN                | 4               | 215         | 219         | 199         | 206         | 208         | 206         | 209         | 185         | -30                | 1                 |
| Contra Costa County,<br>CA | 4               | 314         | 282         | 295         | 301         | 286         | 306         | 333         | 273         | -40                | 1                 |
| Longview, TX               | 4               | 264         | 256         | 427         | 440         | 320         | 312         | 230         | 224         | -40                | 1                 |
| South Bend, IN             | 4               | 254         | 228         | 238         | 243         | 243         | 231         | 231         | 211         | -43                | 1                 |
| Albany, GA                 | 4               | 219         | 183         | 193         | 192         | 188         | 192         | 185         | 173         | -46                | 1                 |
| Cape Girardeau, MO         | 4               | 255         | 223         | 213         | 239         | 218         | 213         | 214         | 209         | -46                | 1                 |
| Bloomington, IL            | 4               | 254         | 264         | 262         | 255         | 245         | 253         | 223         | 207         | -47                | 1                 |
| St. Joseph, MI             | 4               | 233         | 248         | 267         | 249         | 247         | 246         | 181         | 182         | -51                | 1                 |
| Hickory, NC                | 4               | 223         | 199         | 181         | 182         | 176         | 168         | 175         | 171         | -52                | 1                 |
| Casper, WY                 | 4               | 246         | 241         | 245         | 236         | 217         | 208         | 196         | 193         | -52                | 1                 |
| Lawton, OK                 | 4               | 220         | 206         | 189         | 179         | 180         | 176         | 179         | 167         | -54                | 1                 |
| Pueblo, CO                 | 4               | 275         | 228         | 213         | 227         | 244         | 233         | 200         | 197         | -78                | 1                 |
| Lafayette, IN              | 4               | 357         | 341         | 318         | 303         | 320         | 307         | 291         | 279         | -78                | 1                 |

| HRR City                 | 2012<br>qrtile | 2012<br>(%) | 2013<br>(%) | 2014<br>(%) | 2015<br>(%) | 2016<br>(%) | 2017<br>(%) | 2018<br>(%) | 2019<br>(%) | Perc pt.<br>change | Change<br>qrtile |
|--------------------------|----------------|-------------|-------------|-------------|-------------|-------------|-------------|-------------|-------------|--------------------|------------------|
| Gulfport, MS             | 4              | 267         | 262         | 270         | 213         | 180         | 179         | 168         | 158         | -109               | 1                |
| La Crosse, WI            | 3              | 197         | 235         | 297         | 329         | 321         | 304         | 286         | 296         | 99                 | 4                |
| York, PA                 | 3              | 190         | 202         | 208         | 219         | 231         | 241         | 253         | 265         | 75                 | 4                |
| Denver, CO               | 3              | 185         | 187         | 197         | 207         | 215         | 218         | 222         | 248         | 63                 | 4                |
| Redding, CA              | 3              | 187         | 182         | 207         | 237         | 233         | 277         | 253         | 250         | 63                 | 4                |
| Clearwater, FL           | 3              | 190         | 184         | 217         | 216         | 221         | 236         | 259         | 246         | 56                 | 4                |
| Seattle, WA              | 3              | 197         | 189         | 206         | 227         | 224         | 231         | 235         | 236         | 39                 | 4                |
| Rochester, MN            | 3              | 180         | 146         | 169         | 169         | 173         | 189         | 208         | 219         | 39                 | 4                |
| Anchorage, AK            | 3              | 198         | 196         | 213         | 225         | 226         | 223         | 224         | 236         | 38                 | 4                |
| Idaho Falls, ID          | 3              | 193         | 204         | 207         | 209         | 212         | 227         | 229         | 230         | 37                 | 4                |
| Morgantown, WV           | 3              | 186         | 193         | 202         | 204         | 210         | 217         | 222         | 222         | 36                 | 4                |
| Fargo/Moorhead MN,<br>ND | 3              | 188         | 193         | 197         | 205         | 204         | 216         | 227         | 221         | 32                 | 4                |
| Richmond, VA             | 3              | 180         | 181         | 203         | 208         | 203         | 205         | 202         | 208         | 29                 | 4                |
| Albuquerque, NM          | 3              | 187         | 185         | 194         | 204         | 213         | 179         | 220         | 214         | 27                 | 4                |
| Spokane, WA              | 3              | 176         | 175         | 181         | 191         | 182         | 204         | 202         | 202         | 26                 | 4                |
| Los Angeles, CA          | 3              | 181         | 182         | 189         | 201         | 208         | 210         | 211         | 204         | 23                 | 4                |
| Orange County, CA        | 3              | 192         | 188         | 187         | 200         | 208         | 203         | 204         | 212         | 19                 | 4                |
| Burlington, VT           | 3              | 190         | 208         | 219         | 228         | 230         | 220         | 211         | 207         | 17                 | 4                |
| Columbus, OH             | 3              | 181         | 177         | 180         | 187         | 197         | 196         | 192         | 198         | 17                 | 4                |
| Ogden, UT                | 3              | 191         | 190         | 199         | 205         | 219         | 216         | 209         | 208         | 17                 | 4                |
| Portland, OR             | 3              | 193         | 201         | 219         | 205         | 206         | 204         | 206         | 210         | 17                 | 3                |
| Ormond Beach, FL         | 3              | 174         | 180         | 182         | 184         | 170         | 171         | 186         | 191         | 17                 | 3                |
| Asheville, NC            | 3              | 187         | 176         | 176         | 185         | 180         | 205         | 201         | 203         | 17                 | 3                |
| Provo, UT                | 3              | 178         | 180         | 177         | 184         | 196         | 200         | 205         | 194         | 16                 | 3                |
| Minneapolis, MN          | 3              | 185         | 185         | 189         | 198         | 200         | 201         | 204         | 201         | 16                 | 3                |
| Salt Lake City, UT       | 3              | 181         | 183         | 184         | 193         | 199         | 198         | 200         | 196         | 15                 | 3                |
| Salisbury, MD            | 3              | 195         | 195         | 199         | 206         | 199         | 189         | 185         | 209         | 14                 | 3                |
| Wilkes-Barre, PA         | 3              | 182         | 183         | 184         | 183         | 184         | 190         | 193         | 194         | 12                 | 3                |
| Orlando, FL              | 3              | 189         | 186         | 198         | 201         | 198         | 205         | 205         | 201         | 12                 | 3                |
| Winchester, VA           | 3              | 180         | 184         | 182         | 193         | 194         | 190         | 188         | 191         | 11                 | 3                |
| Joplin, MO               | 3              | 193         | 182         | 198         | 205         | 215         | 218         | 211         | 204         | 11                 | 3                |
| Terre Haute, IN          | 3              | 191         | 198         | 190         | 190         | 200         | 193         | 204         | 202         | 11                 | 3                |
| Owensboro, KY            | 3              | 182         | 193         | 201         | 201         | 212         | 210         | 206         | 192         | 10                 | 3                |
| Dayton, OH               | 3              | 183         | 185         | 183         | 193         | 195         | 193         | 194         | 193         | 10                 | 3                |
| Newport News, VA         | 3              | 193         | 184         | 188         | 189         | 191         | 189         | 188         | 203         | 9                  | 3                |
| Arlington, VA            | 3              | 180         | 177         | 188         | 197         | 197         | 181         | 183         | 188         | 8                  | 3                |
| Allentown, PA            | 3              | 180         | 182         | 182         | 207         | 201         | 212         | 212         | 188         | 8                  | 3                |
| Great Falls, MT          | 3              | 181         | 176         | 194         | 194         | 183         | 182         | 186         | 186         | 5                  | 3                |

| HRR City          | 2012<br>qrtille | 2012<br>(%) | 2013<br>(%) | 2014<br>(%) | 2015<br>(%) | 2016<br>(%) | 2017<br>(%) | 2018<br>(%) | 2019<br>(%) | Perc pt.<br>change | Change<br>qrtille |
|-------------------|-----------------|-------------|-------------|-------------|-------------|-------------|-------------|-------------|-------------|--------------------|-------------------|
| Cleveland, OH     | 3               | 191         | 191         | 190         | 192         | 195         | 191         | 189         | 196         | 5                  | 3                 |
| Kansas City, MO   | 3               | 196         | 188         | 197         | 202         | 208         | 207         | 202         | 200         | 4                  | 2                 |
| Wilmington, DE    | 3               | 193         | 194         | 200         | 198         | 194         | 198         | 200         | 197         | 3                  | 2                 |
| Abilene, TX       | 3               | 197         | 220         | 244         | 210         | 172         | 175         | 180         | 199         | 2                  | 2                 |
| Winston-Salem, NC | 3               | 177         | 164         | 166         | 188         | 189         | 183         | 181         | 179         | 2                  | 2                 |
| Victoria, TX      | 3               | 174         | 186         | 209         | 205         | 167         | 176         | 175         | 175         | 1                  | 2                 |
| New Brunswick, NJ | 3               | 184         | 185         | 184         | 176         | 190         | 195         | 189         | 185         | 1                  | 2                 |
| Lebanon, NH       | 3               | 176         | 175         | 180         | 179         | 176         | 180         | 176         | 176         | 1                  | 2                 |
| Jacksonville, FL  | 3               | 182         | 166         | 167         | 173         | 167         | 170         | 178         | 182         | 0                  | 2                 |
| San Diego, CA     | 3               | 199         | 191         | 191         | 200         | 194         | 186         | 203         | 198         | -1                 | 2                 |
| Fresno, CA        | 3               | 191         | 186         | 204         | 204         | 181         | 179         | 186         | 190         | -1                 | 2                 |
| Paducah, KY       | 3               | 195         | 177         | 194         | 219         | 211         | 210         | 208         | 194         | -1                 | 2                 |
| San Angelo, TX    | 3               | 187         | 190         | 174         | 168         | 170         | 172         | 183         | 185         | -2                 | 2                 |
| Bridgeport, CT    | 3               | 194         | 197         | 198         | 194         | 192         | 189         | 197         | 192         | -3                 | 2                 |
| Raleigh, NC       | 3               | 191         | 180         | 184         | 187         | 186         | 200         | 194         | 187         | -4                 | 2                 |
| Phoenix, AZ       | 3               | 189         | 182         | 187         | 175         | 186         | 187         | 181         | 184         | -5                 | 2                 |
| Dallas, TX        | 3               | 179         | 178         | 199         | 203         | 199         | 196         | 177         | 174         | -5                 | 2                 |
| Tempe, TX         | 3               | 175         | 167         | 158         | 164         | 165         | 168         | 168         | 169         | -6                 | 2                 |
| Columbia, SC      | 3               | 189         | 200         | 193         | 180         | 184         | 191         | 182         | 182         | -7                 | 2                 |
| Toledo, OH        | 3               | 174         | 162         | 162         | 164         | 164         | 172         | 165         | 165         | -9                 | 2                 |
| Evanston, IL      | 3               | 197         | 196         | 201         | 200         | 202         | 192         | 182         | 187         | -10                | 1                 |
| Spartanburg, SC   | 3               | 187         | 204         | 212         | 205         | 170         | 147         | 168         | 175         | -12                | 1                 |
| Lubbock, TX       | 3               | 179         | 197         | 217         | 166         | 150         | 159         | 180         | 168         | -12                | 1                 |
| Melrose Park, IL  | 3               | 196         | 200         | 195         | 189         | 185         | 182         | 183         | 182         | -14                | 1                 |
| Hinsdale, IL      | 3               | 185         | 187         | 186         | 185         | 181         | 174         | 174         | 170         | -15                | 1                 |
| Cincinnati, OH    | 3               | 174         | 166         | 161         | 162         | 162         | 163         | 157         | 156         | -18                | 1                 |
| Davenport, IA     | 3               | 174         | 178         | 179         | 182         | 177         | 175         | 161         | 156         | -19                | 1                 |
| Bradenton, FL     | 3               | 179         | 182         | 191         | 191         | 173         | 194         | 197         | 158         | -21                | 1                 |
| Philadelphia, PA  | 3               | 181         | 175         | 175         | 177         | 175         | 170         | 162         | 160         | -21                | 1                 |
| Cedar Rapids, IA  | 3               | 190         | 176         | 172         | 174         | 173         | 171         | 172         | 167         | -23                | 1                 |
| Elgin, IL         | 3               | 188         | 177         | 182         | 177         | 174         | 180         | 171         | 161         | -27                | 1                 |
| Baton Rouge, LA   | 3               | 182         | 186         | 176         | 171         | 160         | 157         | 154         | 151         | -31                | 1                 |
| Waco, TX          | 3               | 183         | 177         | 175         | 180         | 166         | 161         | 161         | 150         | -33                | 1                 |
| Aurora, IL        | 3               | 182         | 185         | 181         | 173         | 172         | 180         | 168         | 148         | -35                | 1                 |
| Tupelo, MS        | 3               | 199         | 200         | 204         | 193         | 182         | 173         | 168         | 157         | -42                | 1                 |
| Yakima, WA        | 3               | 181         | 201         | 200         | 182         | 173         | 190         | 169         | 139         | -42                | 1                 |
| Oxford, MS        | 3               | 177         | 175         | 186         | 190         | 172         | 166         | 156         | 132         | -45                | 1                 |
| Beaumont, TX      | 3               | 179         | 149         | 169         | 169         | 153         | 151         | 133         | 123         | -56                | 1                 |

| HRR City                        | 2012<br>qrtille | 2012<br>(%) | 2013<br>(%) | 2014<br>(%) | 2015<br>(%) | 2016<br>(%) | 2017<br>(%) | 2018<br>(%) | 2019<br>(%) | Perc pt.<br>change | Change<br>qrtille |
|---------------------------------|-----------------|-------------|-------------|-------------|-------------|-------------|-------------|-------------|-------------|--------------------|-------------------|
| Hattiesburg, MS                 | 3               | 190         | 178         | 172         | 141         | 136         | 122         | 121         | 122         | -68                | 1                 |
| Corpus Christi, TX              | 3               | 188         | 186         | 150         | 149         | 157         | 157         | 133         | 111         | -77                | 1                 |
| Ridgewood, NJ                   | 2               | 168         | 165         | 173         | 188         | 204         | 221         | 229         | 226         | 58                 | 4                 |
| Sarasota, FL                    | 2               | 160         | 184         | 212         | 191         | 175         | 216         | 206         | 211         | 51                 | 4                 |
| Charleston, WV                  | 2               | 166         | 149         | 168         | 176         | 185         | 198         | 183         | 209         | 44                 | 4                 |
| Tampa, FL                       | 2               | 165         | 170         | 189         | 194         | 196         | 209         | 210         | 206         | 41                 | 4                 |
| Fort Myers, FL                  | 2               | 169         | 168         | 211         | 201         | 197         | 205         | 204         | 210         | 41                 | 4                 |
| El Paso, TX                     | 2               | 163         | 162         | 174         | 188         | 200         | 202         | 200         | 199         | 36                 | 4                 |
| Harrisburg, PA                  | 2               | 160         | 167         | 177         | 184         | 187         | 189         | 191         | 195         | 35                 | 4                 |
| Charlottesville, VA             | 2               | 170         | 175         | 174         | 173         | 177         | 169         | 194         | 204         | 34                 | 4                 |
| Everett, WA                     | 2               | 160         | 172         | 186         | 201         | 204         | 201         | 193         | 191         | 31                 | 4                 |
| Newark, NJ                      | 2               | 162         | 155         | 164         | 155         | 163         | 195         | 175         | 191         | 30                 | 4                 |
| Minot, ND                       | 2               | 163         | 135         | 110         | 121         | 140         | 160         | 185         | 193         | 29                 | 4                 |
| Atlanta, GA                     | 2               | 169         | 168         | 176         | 182         | 190         | 195         | 196         | 192         | 23                 | 4                 |
| Charleston, SC                  | 2               | 170         | 168         | 186         | 199         | 199         | 197         | 194         | 192         | 22                 | 4                 |
| Mason City, IA                  | 2               | 163         | 158         | 164         | 171         | 172         | 179         | 184         | 185         | 22                 | 4                 |
| Olympia, WA                     | 2               | 173         | 173         | 198         | 228         | 205         | 209         | 207         | 195         | 22                 | 4                 |
| Tyler, TX                       | 2               | 159         | 169         | 192         | 162         | 134         | 135         | 152         | 180         | 21                 | 4                 |
| Durham, NC                      | 2               | 161         | 158         | 161         | 166         | 170         | 175         | 178         | 182         | 21                 | 4                 |
| Tallahassee, FL                 | 2               | 174         | 171         | 176         | 179         | 190         | 191         | 204         | 193         | 20                 | 4                 |
| Lansing, MI                     | 2               | 161         | 153         | 153         | 164         | 166         | 169         | 142         | 180         | 19                 | 4                 |
| Joliet, IL                      | 2               | 158         | 165         | 163         | 158         | 168         | 180         | 165         | 177         | 19                 | 3                 |
| Sun City, AZ                    | 2               | 162         | 143         | 165         | 169         | 161         | 170         | 193         | 181         | 19                 | 3                 |
| Shreveport, LA                  | 2               | 160         | 161         | 173         | 182         | 182         | 175         | 179         | 178         | 18                 | 3                 |
| Hackensack, NJ                  | 2               | 172         | 168         | 159         | 172         | 185         | 183         | 182         | 191         | 18                 | 3                 |
| Danville, PA                    | 2               | 171         | 168         | 170         | 174         | 180         | 184         | 183         | 187         | 17                 | 3                 |
| Tulsa, OK                       | 2               | 166         | 167         | 175         | 180         | 185         | 192         | 186         | 182         | 17                 | 3                 |
| Bakersfield, CA                 | 2               | 163         | 165         | 175         | 170         | 146         | 148         | 172         | 179         | 16                 | 3                 |
| Rome, GA                        | 2               | 173         | 182         | 194         | 194         | 195         | 194         | 194         | 189         | 16                 | 3                 |
| Lakeland, FL                    | 2               | 164         | 162         | 169         | 177         | 180         | 190         | 195         | 179         | 15                 | 3                 |
| Columbia, MO                    | 2               | 173         | 171         | 176         | 179         | 181         | 185         | 184         | 188         | 15                 | 3                 |
| Norfolk, VA                     | 2               | 168         | 164         | 166         | 161         | 166         | 168         | 180         | 183         | 14                 | 3                 |
| Pensacola, FL                   | 2               | 160         | 153         | 157         | 172         | 174         | 172         | 178         | 174         | 14                 | 3                 |
| Greenville, NC                  | 2               | 172         | 168         | 179         | 177         | 185         | 181         | 180         | 185         | 14                 | 3                 |
| St. Louis, MO                   | 2               | 158         | 154         | 162         | 167         | 167         | 172         | 169         | 170         | 12                 | 3                 |
| Dubuque, IA                     | 2               | 171         | 169         | 177         | 182         | 181         | 182         | 184         | 183         | 12                 | 3                 |
| Palm Springs/Rancho<br>Mira, CA | 2               | 172         | 168         | 191         | 198         | 190         | 190         | 182         | 183         | 11                 | 3                 |
| Iowa City, IA                   | 2               | 164         | 154         | 159         | 165         | 162         | 163         | 164         | 175         | 11                 | 3                 |

| HRR City          | 2012<br>qrtille | 2012<br>(%) | 2013<br>(%) | 2014<br>(%) | 2015<br>(%) | 2016<br>(%) | 2017<br>(%) | 2018<br>(%) | 2019<br>(%) | Perc pt.<br>change | Change<br>qrtille |
|-------------------|-----------------|-------------|-------------|-------------|-------------|-------------|-------------|-------------|-------------|--------------------|-------------------|
| Bismarck, ND      | 2               | 163         | 175         | 183         | 196         | 190         | 184         | 179         | 173         | 11                 | 3                 |
| St. Paul, MN      | 2               | 160         | 160         | 167         | 173         | 181         | 186         | 183         | 170         | 10                 | 3                 |
| Wichita, KS       | 2               | 164         | 165         | 178         | 176         | 171         | 173         | 171         | 170         | 6                  | 2                 |
| Marquette, MI     | 2               | 164         | 179         | 192         | 197         | 188         | 191         | 181         | 169         | 4                  | 2                 |
| Waterloo, IA      | 2               | 165         | 165         | 165         | 171         | 170         | 68          | 72          | 169         | 3                  | 2                 |
| Neenah, WI        | 2               | 167         | 162         | 167         | 163         | 170         | 168         | 180         | 170         | 3                  | 2                 |
| Muskegon, MI      | 2               | 160         | 149         | 147         | 144         | 145         | 142         | 145         | 163         | 3                  | 2                 |
| Houma, LA         | 2               | 172         | 163         | 172         | 158         | 153         | 157         | 166         | 174         | 2                  | 2                 |
| Metairie, LA      | 2               | 167         | 169         | 176         | 167         | 159         | 158         | 162         | 168         | 2                  | 2                 |
| Oklahoma City, OK | 2               | 164         | 156         | 180         | 179         | 174         | 174         | 176         | 165         | 1                  | 2                 |
| Miami, FL         | 2               | 170         | 163         | 186         | 185         | 176         | 172         | 169         | 171         | 1                  | 2                 |
| Kettering, OH     | 2               | 166         | 169         | 159         | 161         | 160         | 171         | 164         | 166         | 0                  | 2                 |
| Morristown, NJ    | 2               | 174         | 169         | 157         | 167         | 171         | 167         | 174         | 173         | -1                 | 2                 |
| Savannah, GA      | 2               | 171         | 181         | 177         | 184         | 174         | 164         | 145         | 169         | -2                 | 2                 |
| Lexington, KY     | 2               | 167         | 157         | 158         | 168         | 169         | 167         | 165         | 164         | -3                 | 2                 |
| Fort Worth, TX    | 2               | 172         | 178         | 204         | 202         | 197         | 196         | 176         | 168         | -4                 | 2                 |
| Panama City, FL   | 2               | 170         | 145         | 153         | 142         | 138         | 174         | 162         | 165         | -5                 | 2                 |
| Hartford, CT      | 2               | 160         | 155         | 148         | 159         | 162         | 161         | 153         | 154         | -5                 | 2                 |
| Las Vegas, NV     | 2               | 160         | 166         | 168         | 173         | 168         | 168         | 169         | 154         | -6                 | 2                 |
| Hudson, FL        | 2               | 168         | 170         | 216         | 204         | 175         | 171         | 164         | 162         | -7                 | 2                 |
| Memphis, TN       | 2               | 163         | 165         | 173         | 170         | 173         | 175         | 163         | 155         | -8                 | 2                 |
| Monroe, LA        | 2               | 172         | 160         | 158         | 169         | 163         | 148         | 165         | 162         | -10                | 1                 |
| Reno, NV          | 2               | 160         | 143         | 139         | 143         | 144         | 146         | 147         | 149         | -11                | 1                 |
| Houston, TX       | 2               | 161         | 146         | 157         | 166         | 160         | 155         | 151         | 150         | -12                | 1                 |
| Gainesville, FL   | 2               | 165         | 172         | 173         | 167         | 155         | 155         | 154         | 152         | -13                | 1                 |
| Des Moines, IA    | 2               | 168         | 158         | 163         | 166         | 167         | 158         | 157         | 154         | -14                | 1                 |
| Lafayette, LA     | 2               | 171         | 175         | 166         | 178         | 167         | 167         | 151         | 153         | -18                | 1                 |
| St. Cloud, MN     | 2               | 165         | 164         | 178         | 171         | 157         | 158         | 157         | 147         | -18                | 1                 |
| Akron, OH         | 2               | 166         | 154         | 138         | 152         | 147         | 151         | 150         | 146         | -20                | 1                 |
| Providence, RI    | 2               | 167         | 158         | 149         | 146         | 144         | 142         | 139         | 146         | -21                | 1                 |
| Blue Island, IL   | 2               | 165         | 159         | 159         | 150         | 153         | 160         | 155         | 144         | -21                | 1                 |
| Macon, GA         | 2               | 167         | 158         | 161         | 158         | 156         | 146         | 152         | 146         | -21                | 1                 |
| Traverse City, MI | 2               | 159         | 146         | 144         | 139         | 137         | 133         | 133         | 137         | -22                | 1                 |
| Texarkana, AR     | 2               | 172         | 186         | 218         | 230         | 237         | 210         | 143         | 147         | -25                | 1                 |
| Royal Oak, MI     | 2               | 161         | 150         | 152         | 138         | 139         | 145         | 142         | 133         | -27                | 1                 |
| Paterson, NJ      | 2               | 162         | 167         | 178         | 173         | 188         | 196         | 149         | 134         | -28                | 1                 |
| Springdale, AR    | 2               | 169         | 170         | 171         | 162         | 145         | 142         | 135         | 138         | -31                | 1                 |
| Slidell, LA       | 2               | 165         | 160         | 174         | 169         | 166         | 167         | 145         | 128         | -36                | 1                 |

| HRR City             | 2012<br>qrtille | 2012<br>(%) | 2013<br>(%) | 2014<br>(%) | 2015<br>(%) | 2016<br>(%) | 2017<br>(%) | 2018<br>(%) | 2019<br>(%) | Perc pt.<br>change | Change<br>qrtille |
|----------------------|-----------------|-------------|-------------|-------------|-------------|-------------|-------------|-------------|-------------|--------------------|-------------------|
| Dothan, AL           | 2               | 166         | 163         | 162         | 148         | 137         | 132         | 132         | 128         | -38                | 1                 |
| Jackson, MS          | 2               | 164         | 142         | 167         | 154         | 143         | 133         | 122         | 125         | -39                | 1                 |
| Amarillo, TX         | 1               | 137         | 152         | 154         | 180         | 178         | 198         | 194         | 185         | 48                 | 4                 |
| Austin, TX           | 1               | 153         | 149         | 162         | 194         | 216         | 206         | 199         | 199         | 46                 | 4                 |
| St. Petersburg, FL   | 1               | 154         | 161         | 193         | 192         | 180         | 202         | 192         | 196         | 42                 | 4                 |
| Mesa, AZ             | 1               | 154         | 146         | 151         | 179         | 181         | 176         | 193         | 195         | 41                 | 4                 |
| Nashville, TN        | 1               | 153         | 149         | 162         | 158         | 159         | 172         | 188         | 191         | 39                 | 4                 |
| Scranton, PA         | 1               | 131         | 138         | 156         | 155         | 150         | 154         | 161         | 165         | 34                 | 4                 |
| Manhattan, NY        | 1               | 126         | 132         | 138         | 142         | 144         | 144         | 149         | 156         | 29                 | 4                 |
| Johnstown, PA        | 1               | 119         | 109         | 117         | 135         | 135         | 134         | 139         | 146         | 27                 | 4                 |
| Grand Forks, ND      | 1               | 142         | 140         | 140         | 147         | 153         | 152         | 165         | 169         | 27                 | 4                 |
| Sayre, PA            | 1               | 156         | 143         | 151         | 162         | 163         | 177         | 179         | 182         | 26                 | 4                 |
| Kingsport, TN        | 1               | 145         | 142         | 146         | 153         | 154         | 157         | 168         | 171         | 26                 | 4                 |
| Greensboro, NC       | 1               | 141         | 129         | 145         | 158         | 157         | 160         | 161         | 166         | 25                 | 4                 |
| Huntsville, AL       | 1               | 110         | 111         | 115         | 117         | 115         | 121         | 124         | 135         | 25                 | 4                 |
| White Plains, NY     | 1               | 147         | 141         | 149         | 155         | 157         | 154         | 152         | 168         | 21                 | 4                 |
| Fort Lauderdale, FL  | 1               | 133         | 143         | 149         | 152         | 155         | 155         | 156         | 152         | 19                 | 4                 |
| Harlingen, TX        | 1               | 114         | 125         | 180         | 161         | 144         | 135         | 144         | 132         | 18                 | 4                 |
| Binghamton, NY       | 1               | 143         | 147         | 160         | 162         | 172         | 166         | 160         | 160         | 18                 | 4                 |
| Albany, NY           | 1               | 148         | 150         | 157         | 158         | 160         | 168         | 161         | 165         | 17                 | 4                 |
| Rochester, NY        | 1               | 127         | 117         | 125         | 135         | 142         | 143         | 147         | 144         | 17                 | 4                 |
| East Long Island, NY | 1               | 157         | 157         | 162         | 166         | 174         | 174         | 170         | 175         | 17                 | 3                 |
| Chattanooga, TN      | 1               | 132         | 142         | 139         | 131         | 160         | 162         | 159         | 148         | 17                 | 3                 |
| San Bernardino, CA   | 1               | 140         | 141         | 144         | 153         | 154         | 153         | 161         | 157         | 16                 | 3                 |
| Grand Rapids, MI     | 1               | 142         | 142         | 144         | 149         | 156         | 156         | 155         | 158         | 16                 | 3                 |
| Syracuse, NY         | 1               | 124         | 126         | 129         | 138         | 141         | 132         | 138         | 139         | 14                 | 3                 |
| Baltimore, MD        | 1               | 138         | 134         | 136         | 134         | 141         | 159         | 161         | 150         | 12                 | 3                 |
| Bronx, NY            | 1               | 101         | 121         | 122         | 124         | 113         | 101         | 106         | 112         | 11                 | 3                 |
| Saginaw, MI          | 1               | 157         | 162         | 167         | 177         | 177         | 173         | 170         | 168         | 11                 | 3                 |
| Takoma Park, MD      | 1               | 105         | 102         | 110         | 124         | 116         | 116         | 115         | 116         | 11                 | 3                 |
| Appleton, WI         | 1               | 150         | 150         | 155         | 162         | 157         | 154         | 167         | 161         | 11                 | 3                 |
| Worcester, MA        | 1               | 80          | 77          | 79          | 85          | 93          | 96          | 92          | 91          | 11                 | 3                 |
| Honolulu, HI         | 1               | 136         | 128         | 140         | 149         | 145         | 146         | 149         | 147         | 10                 | 3                 |
| Ann Arbor, MI        | 1               | 153         | 153         | 156         | 157         | 162         | 164         | 164         | 163         | 10                 | 3                 |
| Springfield, MA      | 1               | 99          | 99          | 103         | 103         | 108         | 147         | 206         | 106         | 8                  | 3                 |
| New Orleans, LA      | 1               | 116         | 122         | 112         | 101         | 117         | 129         | 129         | 123         | 7                  | 3                 |
| Louisville, KY       | 1               | 156         | 142         | 154         | 157         | 162         | 161         | 159         | 163         | 7                  | 3                 |
| Elyria, OH           | 1               | 124         | 117         | 126         | 134         | 132         | 141         | 136         | 131         | 7                  | 3                 |

| HRR City          | 2012<br>qrtille | 2012<br>(%) | 2013<br>(%) | 2014<br>(%) | 2015<br>(%) | 2016<br>(%) | 2017<br>(%) | 2018<br>(%) | 2019<br>(%) | Perc pt.<br>change | Change<br>qrtille |
|-------------------|-----------------|-------------|-------------|-------------|-------------|-------------|-------------|-------------|-------------|--------------------|-------------------|
| Pittsburgh, PA    | 1               | 124         | 123         | 127         | 127         | 127         | 124         | 127         | 131         | 7                  | 3                 |
| Washington, DC    | 1               | 133         | 128         | 131         | 138         | 141         | 144         | 142         | 140         | 6                  | 3                 |
| Jonesboro, AR     | 1               | 103         | 106         | 109         | 113         | 118         | 115         | 107         | 109         | 6                  | 2                 |
| Erie, PA          | 1               | 135         | 136         | 137         | 136         | 136         | 136         | 139         | 141         | 6                  | 2                 |
| San Antonio, TX   | 1               | 148         | 151         | 167         | 179         | 165         | 165         | 161         | 154         | 6                  | 2                 |
| Dearborn, MI      | 1               | 131         | 125         | 126         | 129         | 136         | 125         | 138         | 134         | 3                  | 2                 |
| Chicago, IL       | 1               | 155         | 154         | 154         | 154         | 151         | 152         | 155         | 157         | 2                  | 2                 |
| Ocala, FL         | 1               | 149         | 150         | 155         | 163         | 161         | 158         | 156         | 151         | 2                  | 2                 |
| Boston, MA        | 1               | 122         | 120         | 121         | 123         | 129         | 127         | 125         | 123         | 1                  | 2                 |
| Elmira, NY        | 1               | 145         | 134         | 136         | 144         | 149         | 145         | 140         | 145         | 0                  | 2                 |
| Meridian, MS      | 1               | 137         | 131         | 161         | 159         | 166         | 148         | 114         | 137         | -1                 | 2                 |
| Detroit, MI       | 1               | 137         | 132         | 140         | 140         | 141         | 148         | 138         | 137         | -1                 | 2                 |
| Augusta, GA       | 1               | 138         | 132         | 142         | 141         | 146         | 148         | 150         | 137         | -1                 | 2                 |
| Pontiac, MI       | 1               | 130         | 125         | 124         | 126         | 125         | 128         | 131         | 129         | -1                 | 2                 |
| Bryan, TX         | 1               | 155         | 173         | 226         | 191         | 156         | 167         | 164         | 152         | -3                 | 2                 |
| Canton, OH        | 1               | 140         | 141         | 138         | 109         | 123         | 119         | 144         | 136         | -4                 | 2                 |
| Youngstown, OH    | 1               | 143         | 137         | 135         | 138         | 135         | 143         | 142         | 139         | -4                 | 2                 |
| Wilmington, NC    | 1               | 140         | 130         | 133         | 139         | 146         | 143         | 139         | 136         | -4                 | 2                 |
| Jackson, TN       | 1               | 130         | 133         | 143         | 141         | 148         | 152         | 133         | 125         | -5                 | 2                 |
| Wichita Falls, TX | 1               | 154         | 181         | 164         | 140         | 178         | 184         | 158         | 149         | -5                 | 2                 |
| Little Rock, AR   | 1               | 134         | 122         | 124         | 126         | 130         | 129         | 125         | 129         | -5                 | 2                 |
| Petoskey, MI      | 1               | 150         | 150         | 142         | 144         | 146         | 144         | 143         | 145         | -5                 | 1                 |
| New Haven, CT     | 1               | 157         | 158         | 154         | 148         | 152         | 146         | 154         | 151         | -6                 | 1                 |
| Tuscaloosa, AL    | 1               | 101         | 96          | 105         | 106         | 108         | 95          | 96          | 95          | -7                 | 1                 |
| Knoxville, TN     | 1               | 147         | 144         | 164         | 160         | 151         | 153         | 147         | 138         | -9                 | 1                 |
| Lake Charles, LA  | 1               | 144         | 151         | 145         | 146         | 147         | 134         | 130         | 133         | -10                | 1                 |
| Altoona, PA       | 1               | 126         | 128         | 125         | 125         | 125         | 124         | 124         | 115         | -11                | 1                 |
| Montgomery, AL    | 1               | 119         | 120         | 120         | 126         | 130         | 125         | 119         | 107         | -12                | 1                 |
| McAllen, TX       | 1               | 121         | 159         | 180         | 175         | 182         | 232         | 168         | 109         | -12                | 1                 |
| Flint, MI         | 1               | 120         | 113         | 109         | 111         | 110         | 114         | 114         | 107         | -13                | 1                 |
| Buffalo, NY       | 1               | 113         | 110         | 106         | 113         | 108         | 102         | 103         | 99          | -14                | 1                 |
| Kalamazoo, MI     | 1               | 138         | 130         | 132         | 138         | 131         | 131         | 125         | 124         | -15                | 1                 |
| Odessa, TX        | 1               | 148         | 142         | 150         | 152         | 150         | 155         | 127         | 133         | -15                | 1                 |
| Columbus, GA      | 1               | 153         | 119         | 111         | 113         | 140         | 144         | 140         | 138         | -15                | 1                 |
| Johnson City, TN  | 1               | 143         | 136         | 133         | 137         | 133         | 134         | 133         | 127         | -16                | 1                 |
| Birmingham, AL    | 1               | 133         | 126         | 123         | 128         | 119         | 119         | 115         | 116         | -17                | 1                 |
| Sioux City, IA    | 1               | 154         | 155         | 160         | 156         | 150         | 142         | 143         | 137         | -17                | 1                 |
| Tucson, AZ        | 1               | 129         | 125         | 127         | 120         | 117         | 121         | 112         | 112         | -17                | 1                 |



| HRR City       | 2012<br>qrtille | 2012<br>(%) | 2013<br>(%) | 2014<br>(%) | 2015<br>(%) | 2016<br>(%) | 2017<br>(%) | 2018<br>(%) | 2019<br>(%) | Perc pt.<br>change | Change<br>qrtille |
|----------------|-----------------|-------------|-------------|-------------|-------------|-------------|-------------|-------------|-------------|--------------------|-------------------|
| Fort Smith, AR | 1               | 136         | 118         | 149         | 146         | 138         | 133         | 130         | 118         | -18                | 1                 |
| Mobile, AL     | 1               | 145         | 142         | 133         | 129         | 122         | 129         | 127         | 123         | -23                | 1                 |
| Alexandria, LA | 1               | 149         | 138         | 140         | 166         | 150         | 131         | 141         | 125         | -23                | 1                 |

SOURCE: Authors’ analysis of 2012-2019 Healthcare Provider Cost Reporting Information System (HCRIS) data.

NOTES: Price ratio estimates reflect estimated commercial revenue-to-charge ratios divided by Medicare revenue-to-charge ratios. The change quartile reflects the percentage point change quartile from 2012 to 2019 within a given 2012 price ratio quartile .

**REFERENCES**

<sup>1</sup> RAND Corporation. RAND Hospital Data: Frequently asked questions (FAQs) [Internet]. Santa Monica (CA): RAND Corporation; 2021 [cited 2021 June 23]. Available from: <https://www.hospitaldatasets.org/faq>.

<sup>2</sup> Sacarny, A. CMS hospital cost report (HCRIS) data 2000-2019. 2020 Mar 22 [cited 2021 June 23]. Available from: <https://github.com/asacarny/hospital-cost-reports>.

<sup>3</sup> Whaley CM, Briscoombe B, Kerber R, O’Neill B, Kofner A. Nationwide evaluation of health care prices paid by private health plans: findings from round 3 of an employer-led transparency initiative [Internet]. Santa Monica (CA): RAND Corporation; 2020 Sep 18. Available from: [https://www.rand.org/pubs/research\\_reports/RR4394.html](https://www.rand.org/pubs/research_reports/RR4394.html).
